# Supplementary material for: Wild-type FUS corrects ALS-like disease induced by cytoplasmic mutant FUS through autoregulation
Source: bioRxiv or medRxiv preprint supplement (doi:10.1101/2020.12.16.423060), 2020-12-16

# Sanjuan-Ruiz et al. Figure S1

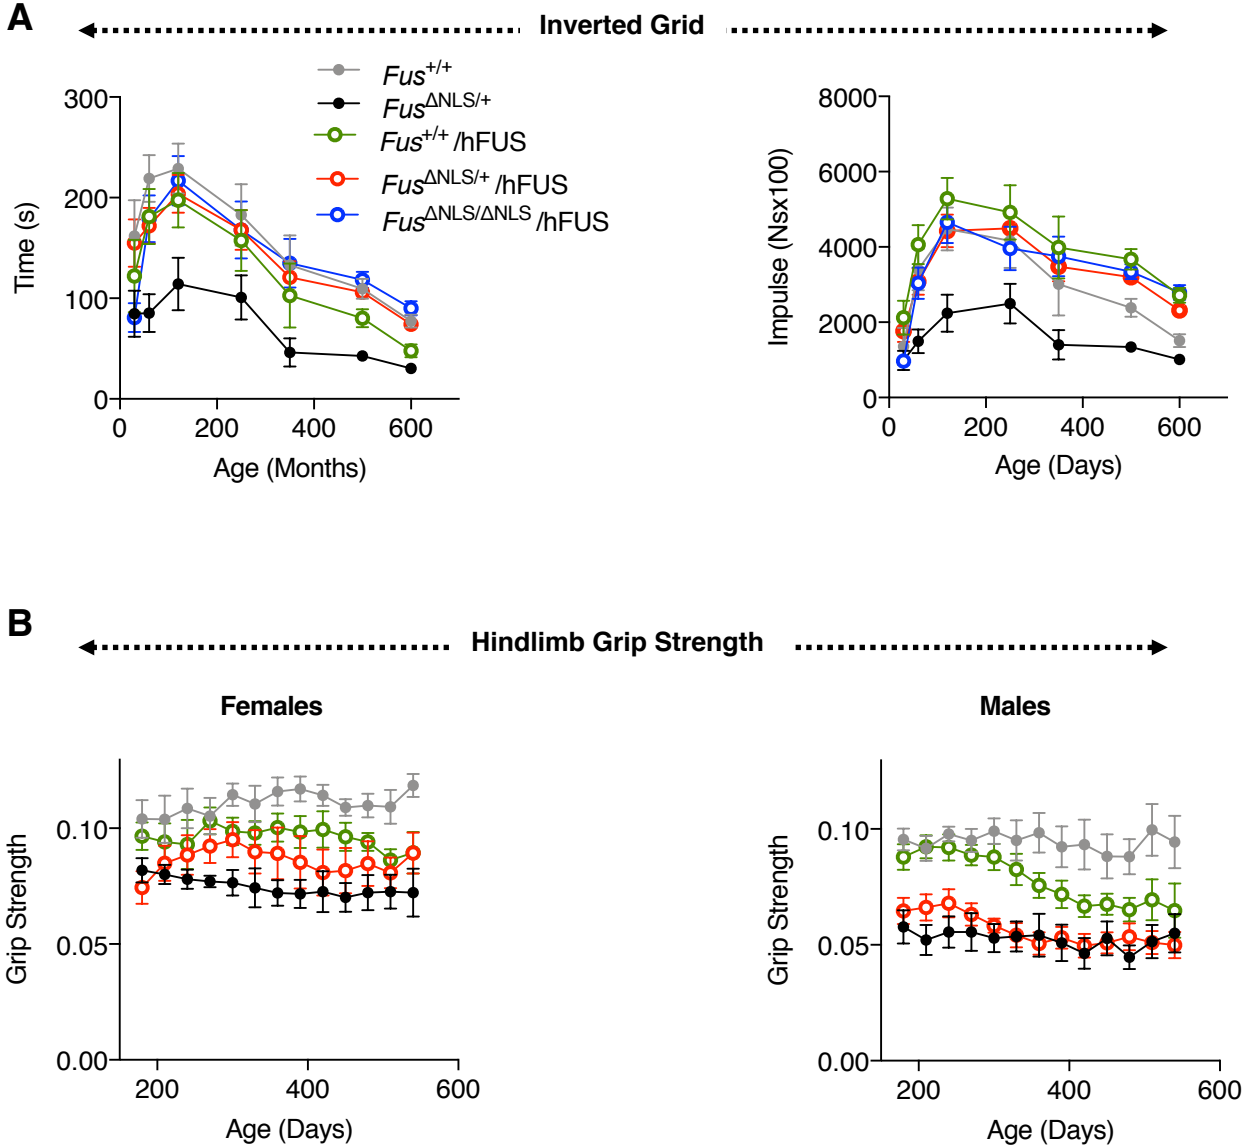



Sanjuan-Ruiz et al. Figure S3

Uncropped western blots Figure 2A

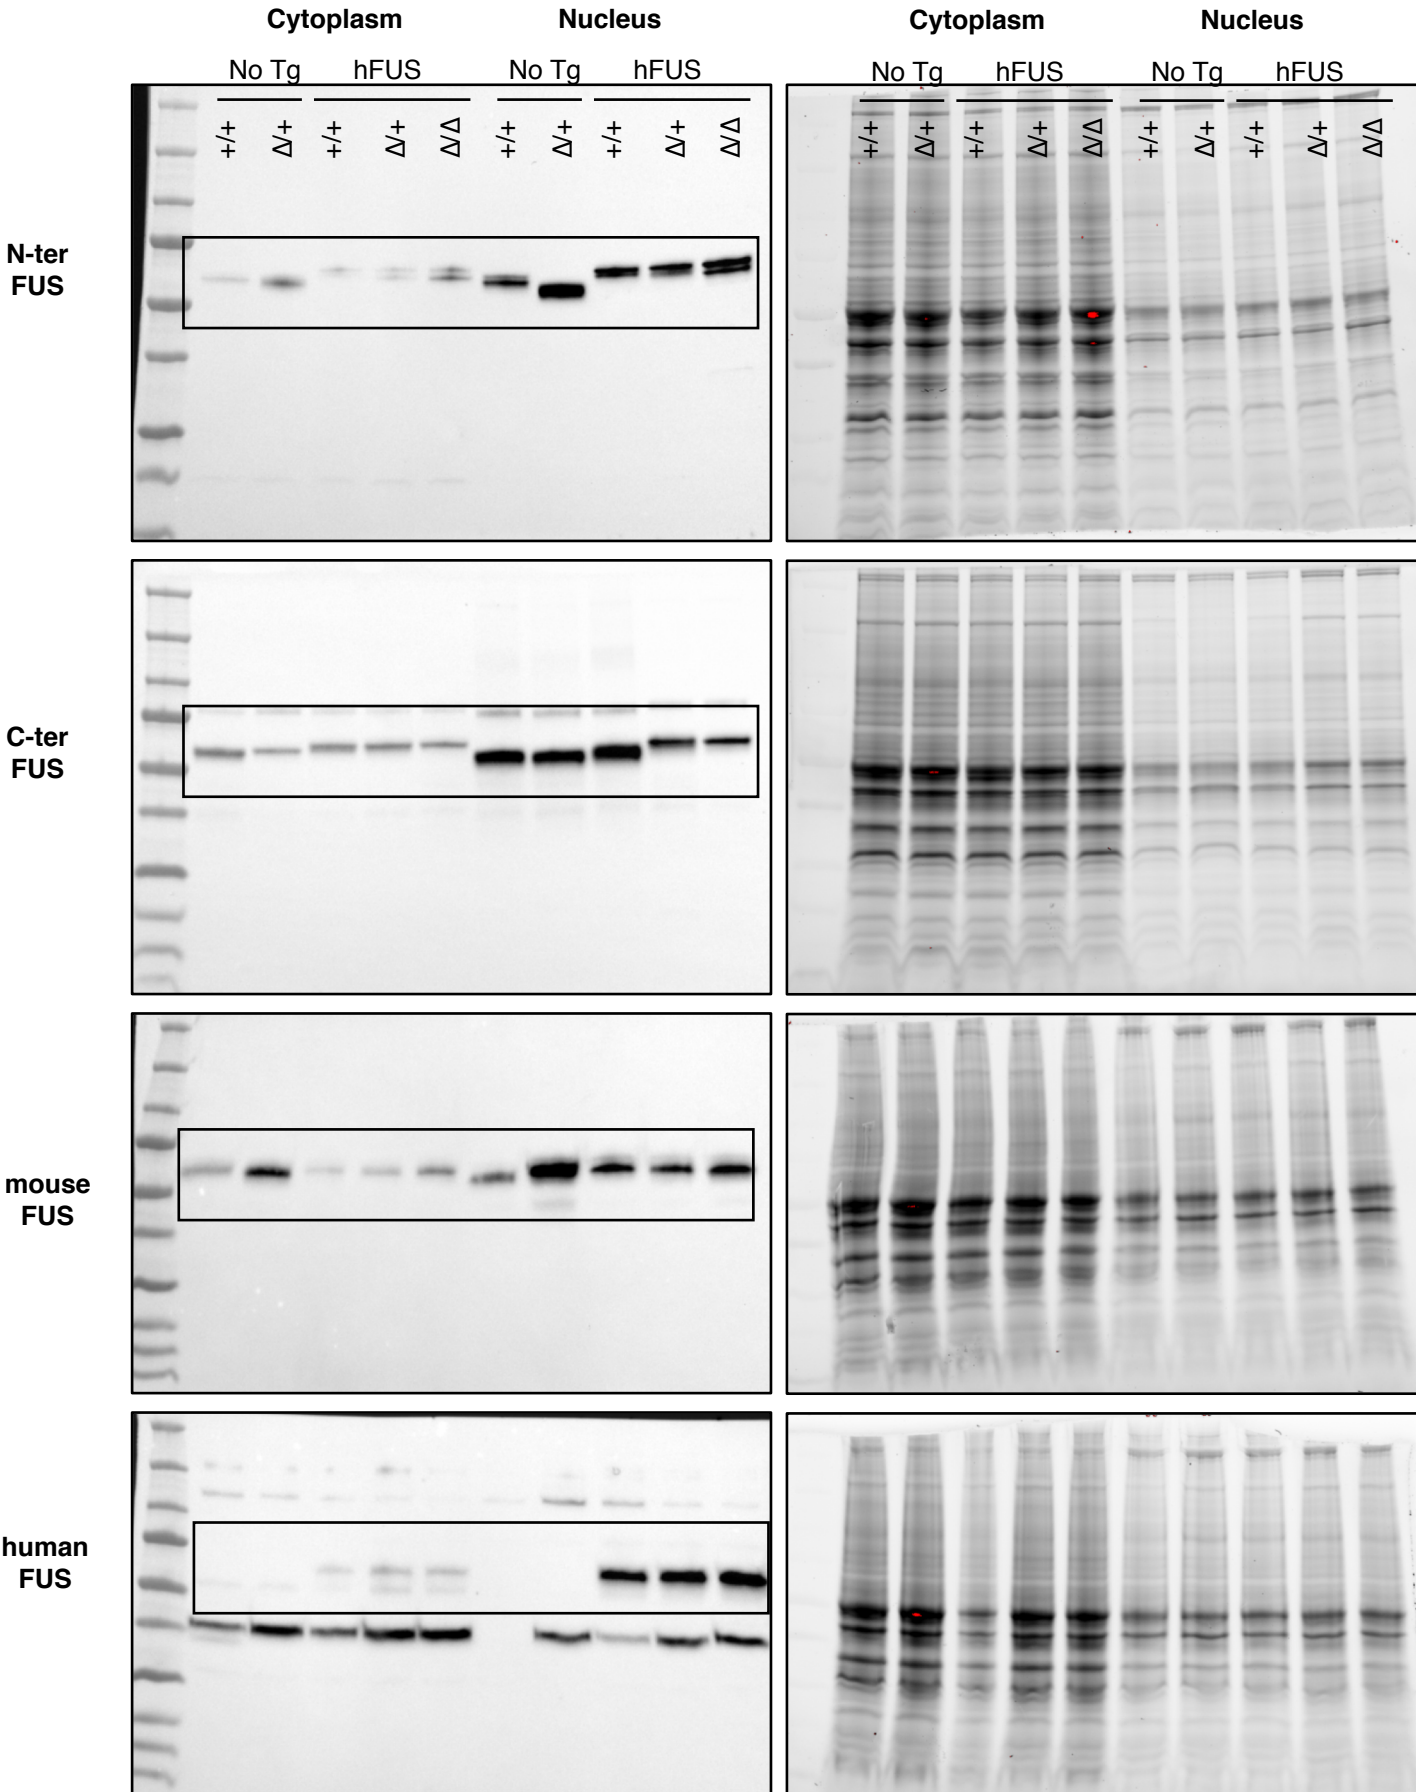



# Sanjuan-Ruiz et al. Figure S4

**A**

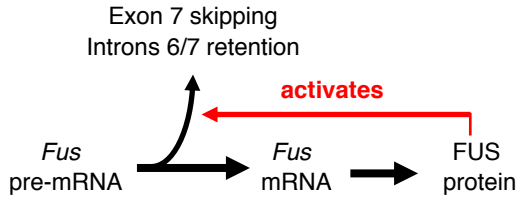

**B**

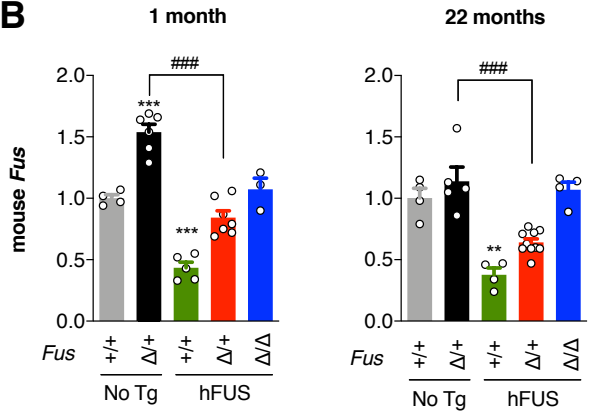

**C**

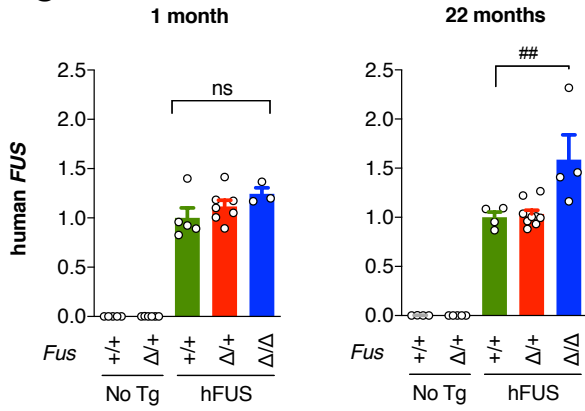

**D**

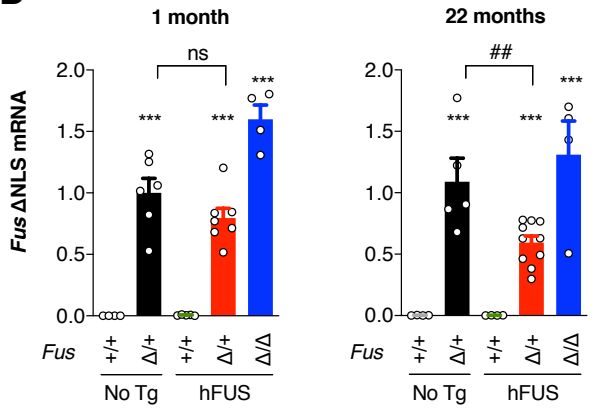

**E**

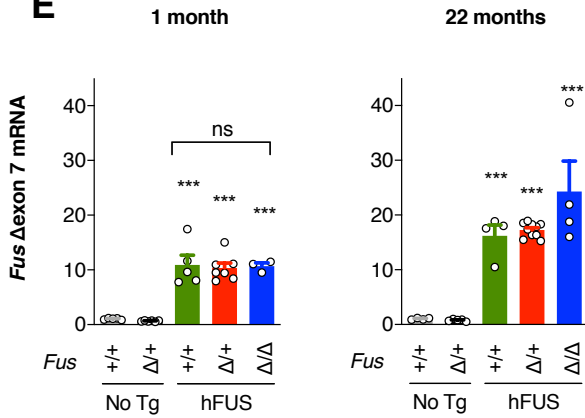

**F**

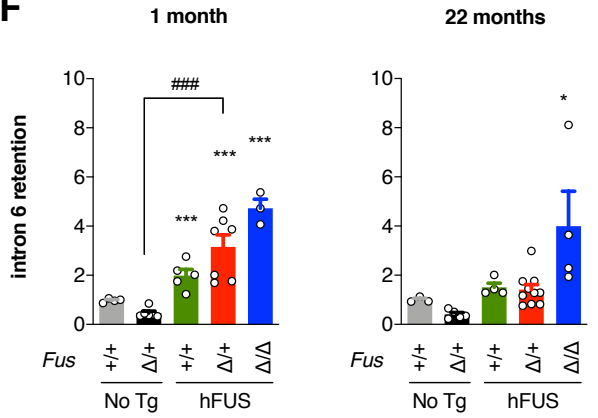

**G**

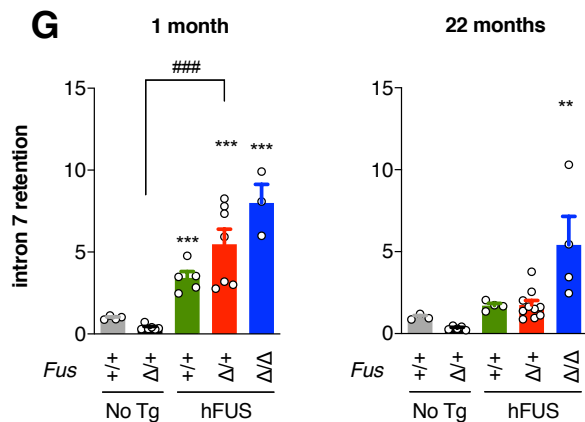

**H**

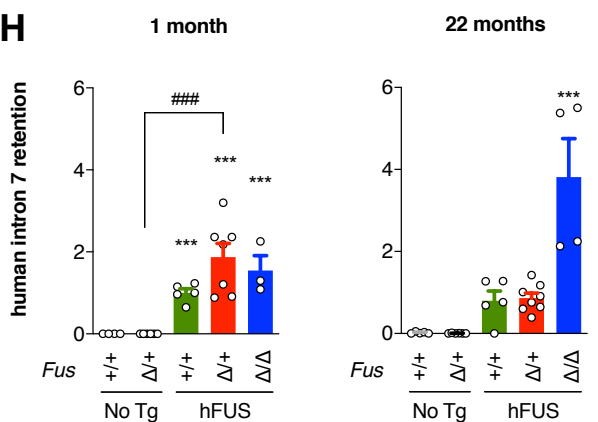

Zeb 1 mRNA levels

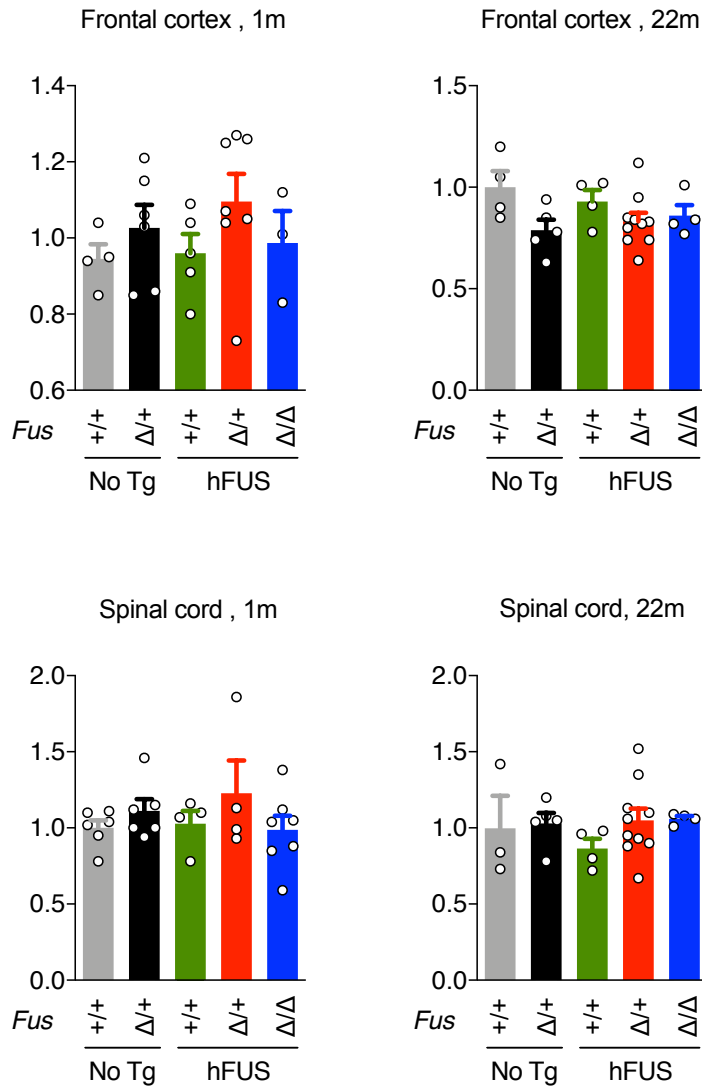

Supplement: Supplementary file [file media-1.pdf]
